# Supplementary material for: ETVs dictate hPSC differentiation by tuning biophysical properties
Source: Springer Nature journal article supplement (doi:10.1038/s41467-025-56591-6), 2025-02-26

## Supplementary Figures

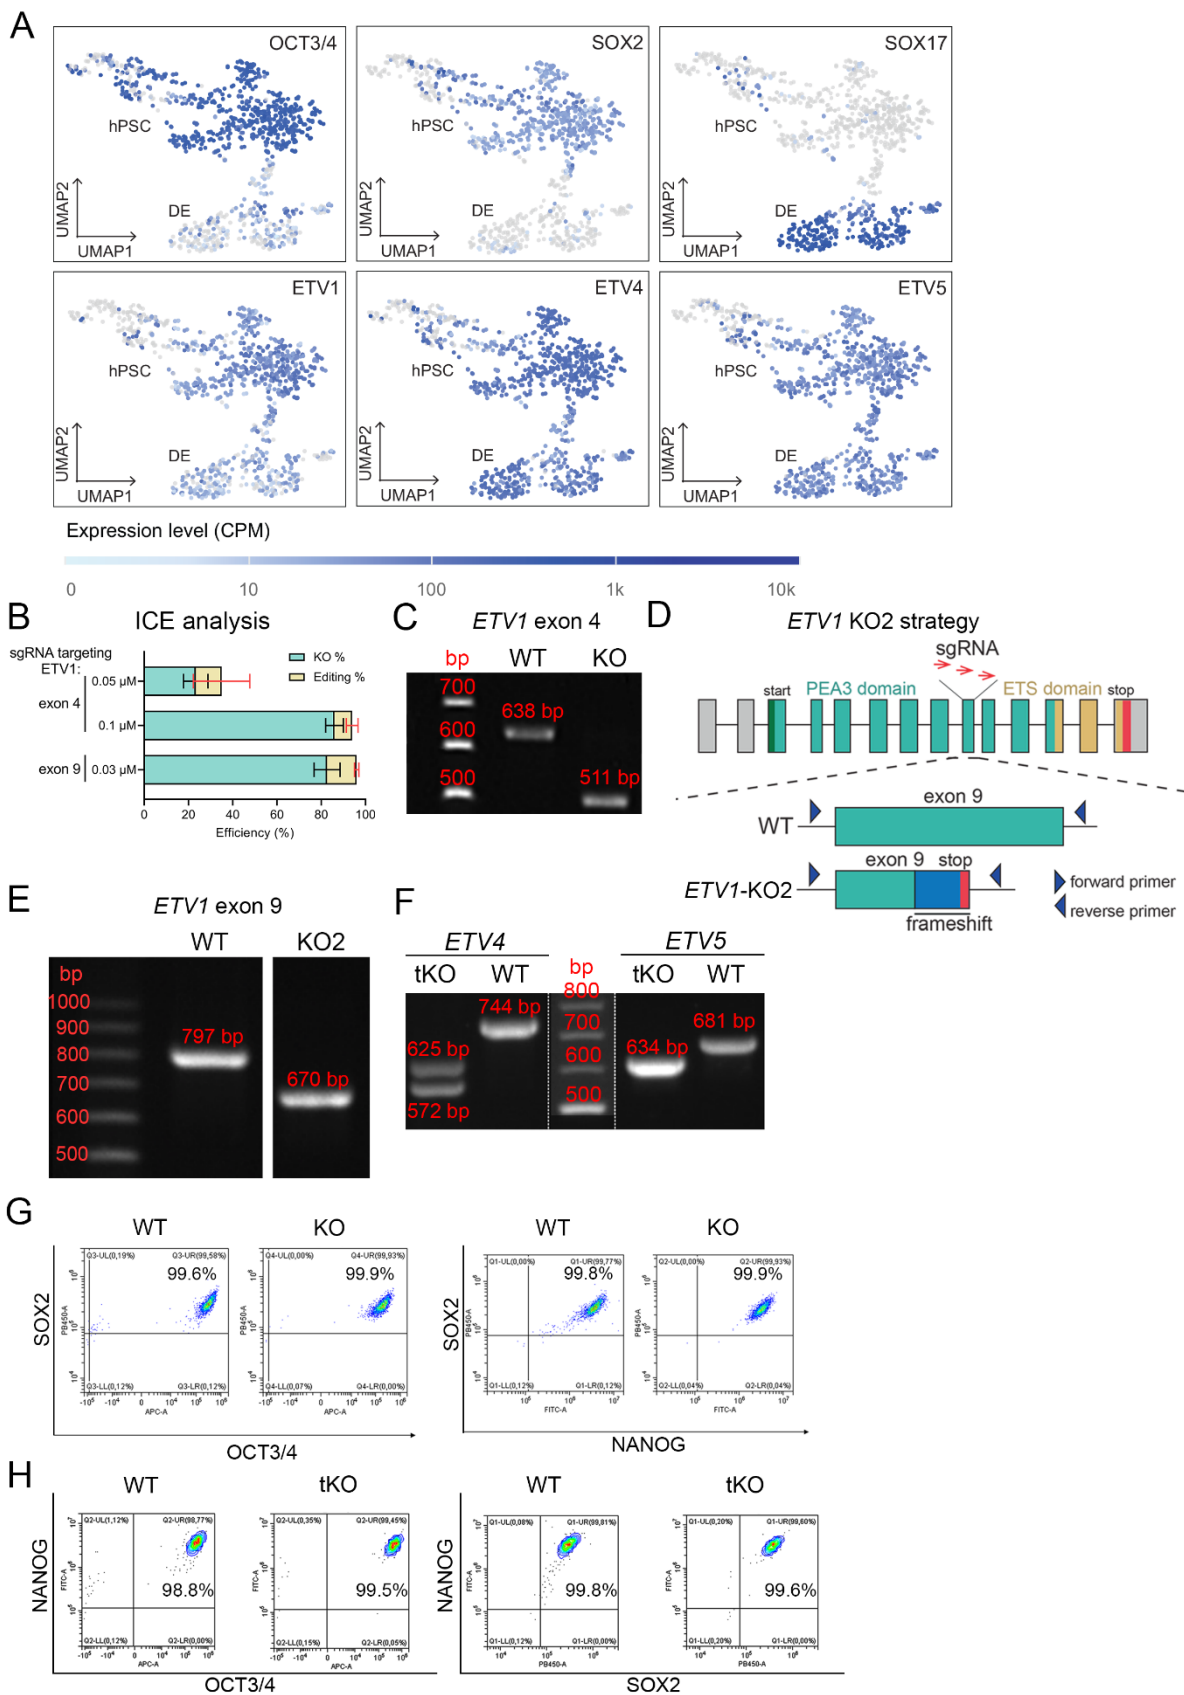

**Supplementary Figure 1. Generation of the second loss-of-function *ETV1* KO hPSC line and preliminary characterization of *ETV1*, *ETV4*, *ETV5* KO hPSCs**

- A.** UMAP plots show cells at the pluripotent stage (OCT3/4 and SOX2 positive) and definitive endoderm (SOX17 positive) (upper panel) expressing *ETV1*, *ETV4*, and *ETV5* (bottom panel). The expression of *ETV1* is higher in hPSCs, while *ETV4* and *ETV5* show comparable expression levels in both hPSCs and DE<sup>1</sup>. Dark blue dots – cells with high gene expression levels; light blue dots – cells with low gene expressions; gray dots – expression not detected. CPM - counts-per-million normalization.
- B.** The editing efficiency of *ETV1*, as determined by Inference of CRISPR Edits (ICE) analysis, shows an average indel rate at ~80% that caused knock-out mutation (KO%) of *ETV1*. This efficiency was achieved using 0.1  $\mu$ M sgRNAs targeting exon 4 and 0.03  $\mu$ M sgRNAs targeting exon 9.
- C.** Representative picture of the agarose gel electrophoresis demonstrating a 127 bp deletion in exon 4 of the *ETV1* gene in ETV1 KO hPSCs.
- D.** Strategy to knockout the *ETV1* gene (KO2) in hPSCs using CRISPR/Cas9 approach. Three different sgRNAs (red arrows) targeting exon 9 of the *ETV1* gene were co-transfected into hPSCs, pretreated with doxycycline to induce Cas9 expression. CRISPR/Cas9 edition resulted in a 127 nucleotide deletion and the occurrence of a premature stop codon. Untranslated regions (grey), PEA3 domain (turquoise green), ETS domain (dark yellow), STOP codon (red). Primer positions are indicated by arrowheads.
- E.** Representative picture of the agarose gel electrophoresis demonstrating a 127 bp deletion in exon 9 of the *ETV1* gene in *ETV1* KO2 hPSCs.
- F.** Representative picture of agarose gel electrophoresis demonstrating a 119 bp deletion in exon 2/3 of the *ETV4* gene (left panel), and a 47 bp deletion in exon 3/4 of the *ETV5* gene (right panel), in tKO hPSCs.
- G.** Representative flow cytometry analysis demonstrates similar protein levels of SOX2, OCT3/4 and NANOG in both KO and WT hPSCs,  $N = 3$  biological replicates.
- H.** Representative flow cytometry analysis demonstrates a similar protein levels of SOX2, OCT3/4 and NANOG in both tKO and WT hPSCs,  $N = 3$  biological replicates.

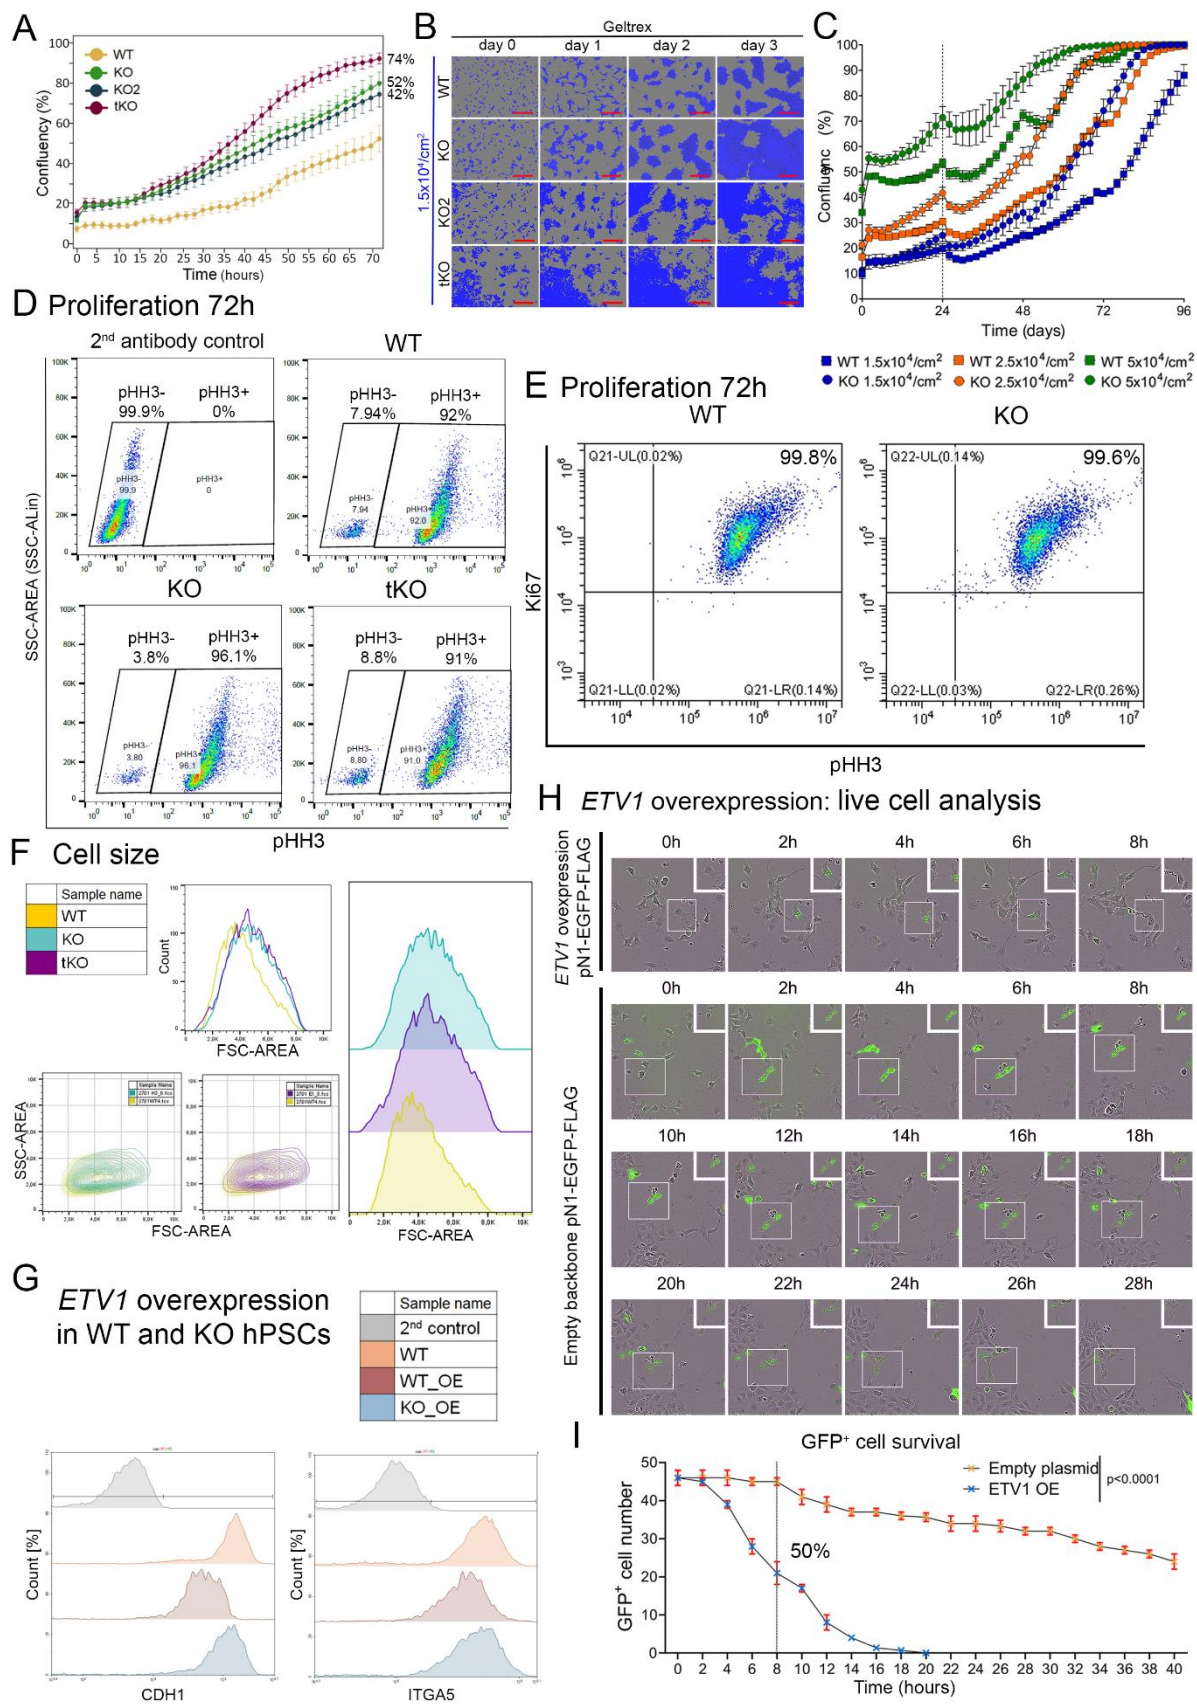

**Supplementary Figure 2. Increased cell-extracellular matrix and cell-cell adhesion of *ETV1* and *ETV1/ETV4/ETV5* deficient hPSCs**

- A.** Live-cell confluency analysis of WT (yellow), KO (light green), KO2 (dark green) and tKO (maroon) hPSCs over 70 h of culture shows the highest increase in confluency in case of tKO (74%), with 52% and 42% increases in KO and KO2, respectively, compared to WT.  $N = 3$  biological replicates. Scale bar = 400  $\mu\text{m}$ .
- B.** Representative images of live-cell analysis of WT, KO, KO2. and tKO hPSC on Geltrex-coated plates during a 3-day culture period. All cell lines were seeded at a starting density of  $1.5 \times 10^5$  cells/cm<sup>2</sup>. Enhanced confluency in ETV deficient cell lines was observed after 1 day of culture and this trend was maintained till day 3.  $N = 3$  biological replicates. Scale bar = 400  $\mu\text{m}$ .
- C.** Live-cell confluency analysis of KO (circle) and WT (square) hPSCs over 96 h of culture with different starting cell densities:  $1.5 \times 10^5$  cells/cm<sup>2</sup> (blue),  $2.5 \times 10^5$  cells/cm<sup>2</sup> (orange) and  $5 \times 10^5$  cells/cm<sup>2</sup> (green). Increased confluency was observed in KO compared to WT hPSCs independent of the starting cell density.  $N = 3$  biological replicates.
- D.** Representative flow cytometry analysis demonstrates similar proliferation rates (marked by pH3+ cells) of WT, KO and tKO hPSCs over 72 h culture.  $N = 3$  biological replicates.
- E.** Representative flow cytometry analysis demonstrates similar proliferation levels (marked by Ki67+ cells) of WT and KO hPSCs over 72 h culture.  $N = 3$  biological replicates.
- F.** Representative flow cytometry analysis demonstrates increased cell size (measured as FSC-area) of KO (green) and tKO (maroon) hPSCs compared to WT (yellow) hPSCs.  $N = 3$  biological replicates.
- G.** Representative flow cytometry analysis demonstrates decreased level of adhesion proteins: CDH1 and ITGA5 after doxycycline induction of ETV1 ectopic expression in WT\_OE (brown) and KO\_OE (blue) hPSC lines compared to WT (orange) hPSCs. CDH1:  $N = 4$  biological replicates; ITGA5:  $N = 3$  biological replicates.
- H.** Representative live-cell bright-field images of single hPSCs showing a green fluorescence signal (GFP), following hPSC transfection with either a transient *ETV1* overexpression pN1-EGFP-FLAG or a backbone plasmid as control. The hPSCs with transient ectopic ETV1 expression began detaching from the plate surface at 6 h after GFP signal appearance, while hPSCs transfected with control plasmid continued to grow and maintained GFP expression.  $N = 3$  biological replicates.
- I.** Quantification of GFP+ hPSCs following transfection with *ETV1* cDNA-encoding (ETV1 OE) plasmid or a backbone plasmid as control, demonstrates a continuous decrease in cell number with transient ETV1 OE. The 50% decrease in GFP+ cells is observed at 8 h after the detection of GFP signal, compared to the control.  $N = 4$  biological replicates.



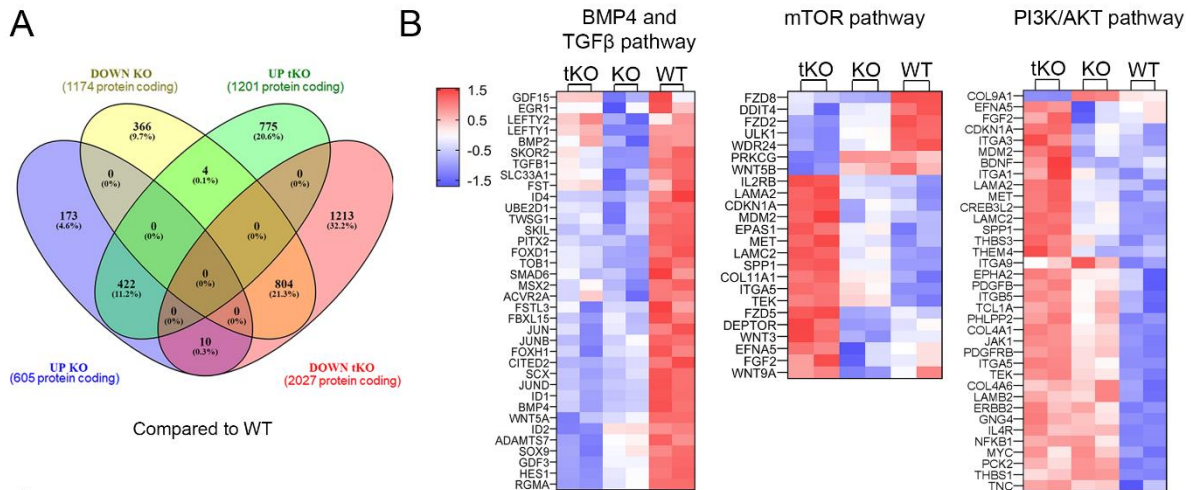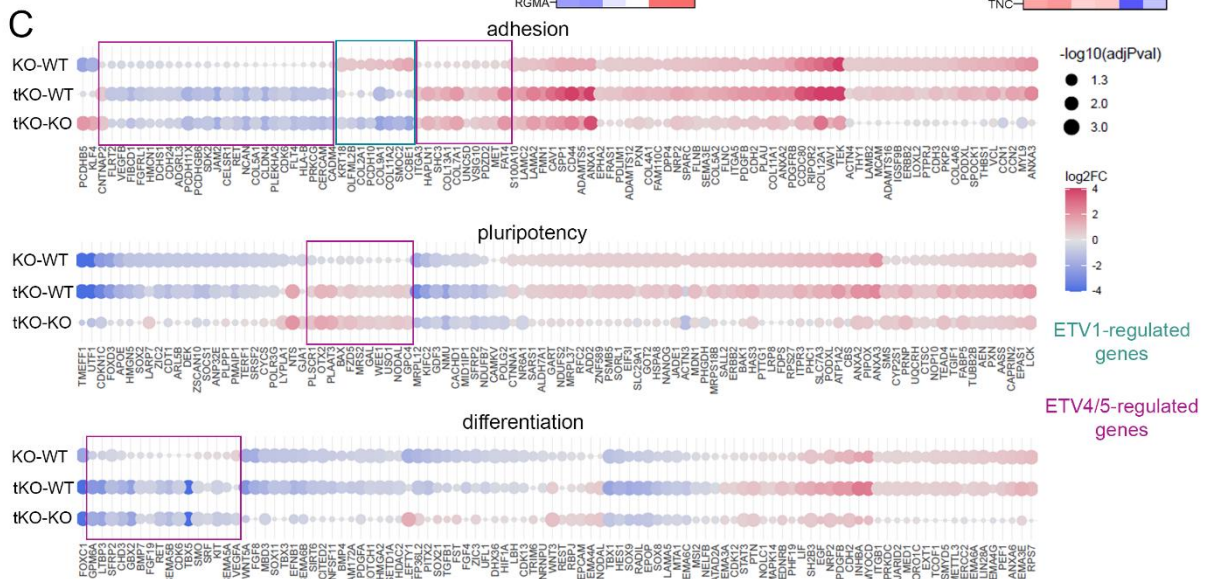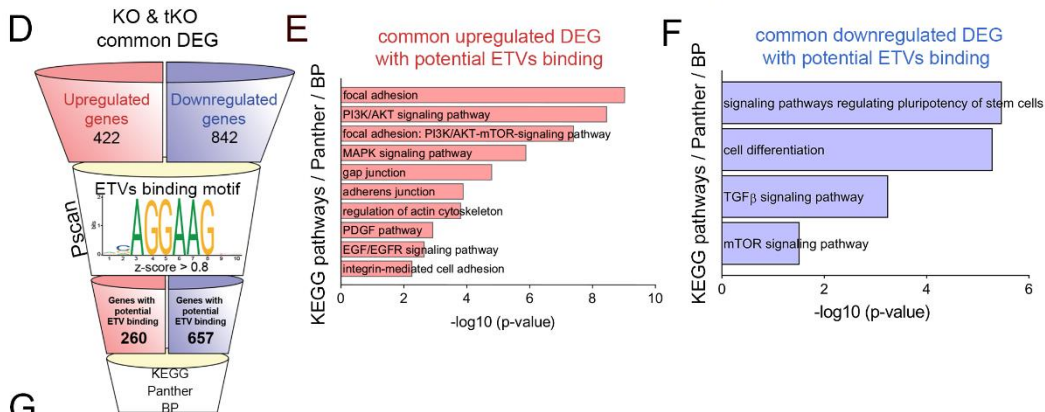

**G**

| Gene   | Position from TSS | ETV1 binding sequence | z-score  |
|--------|-------------------|-----------------------|----------|
| CDKN1A | -646              | CCCGGAAGCA            | 0.907951 |
| COL4A6 | -140              | AACGGAAGGT            | 0.856607 |
| ITGA5  | -590              | AGCGGAAGCT            | 0.864311 |
| JUN    | -539              | CCCGGAAGTG            | 0.928676 |
| PDGFRB | -645              | AACGGAAGCC            | 0.884747 |
| VCL    | -222              | ACCGGATTCC            | 0.813414 |

**Supplementary Figure 3. RNA-sequencing analysis reveals genes and pathways differentially expressed in *ETV1* KO and *ETV1*, *ETV4* and *ETV5* tKO hPSCs**

- A.** Venn diagram shows the distribution of individual and common genes with changed expression in KO or tKO compared to WT hPSCs. Significantly upregulated ( $\log_2 \text{FC} \geq 0.05$ ,  $p \leq 0.05$ ) or downregulated ( $\log_2 \text{FC} \leq -0.05$ ,  $p \leq 0.05$ ) differentially expressed genes were selected for further analysis.
- B.** Heatmap shows the expression pattern of differentially expressed genes in KO and tKO associated with TGF $\beta$  and BMP, mTOR and PI3K/AKT pathways. Each column represents the studied cell line included in the RNA-seq experiment (WT, KO and tKO in duplicate), while each row represents a corresponding gene. Upregulated genes – red; downregulated genes – blue.
- C.** Dot plot demonstrates differentially expressed genes associated with adhesion (upper panel), pluripotency (middle panel), and differentiation (bottom panel). *ETV1*-regulated genes are marked by a green rectangle, while *ETV4*/*ETV5*-regulated genes are marked by maroon rectangles.
- D.** Scheme presenting the *in silico* analysis of the *ETV1*, *ETV4* and *ETV5* DNA binding motif prediction among differentially expressed genes (common for the KO vs. WT and tKO vs. WT comparisons). Among the 422 upregulated (red) and 842 downregulated (blue) genes in KO and tKO compared to WT, 260 and 657 genes, respectively, contain a potential binding motif for PEA3 subfamily members.
- E.** Bar plot representing the enriched functional terms related to cell adhesion, PI3K/AKT or adherence junctions (based on KEGG, Panther and Biological Processes databases) among common upregulated genes for KO and tKO compared to WT, with a potential binding site for PEA3 subfamily members.
- F.** Bar plot representing the enriched functional terms related to pathways associated with pluripotency or differentiation (based on KEGG, Panther and Biological Processes databases), among common downregulated genes for KO and tKO compared to WT, with a potential binding site for PEA3 subfamily members.
- G.** Table shows the position relative to the transcription start site (TSS), the *ETV1* binding sequence, and z-score for *ETV1*-dependent genes associated with cell adhesion, i.e. *ITGA5*, *VCL*, *PDGFRB*, and *COL4A* or genes regulating pluripotency, i.e. *JUN* and *CDKN1A*.

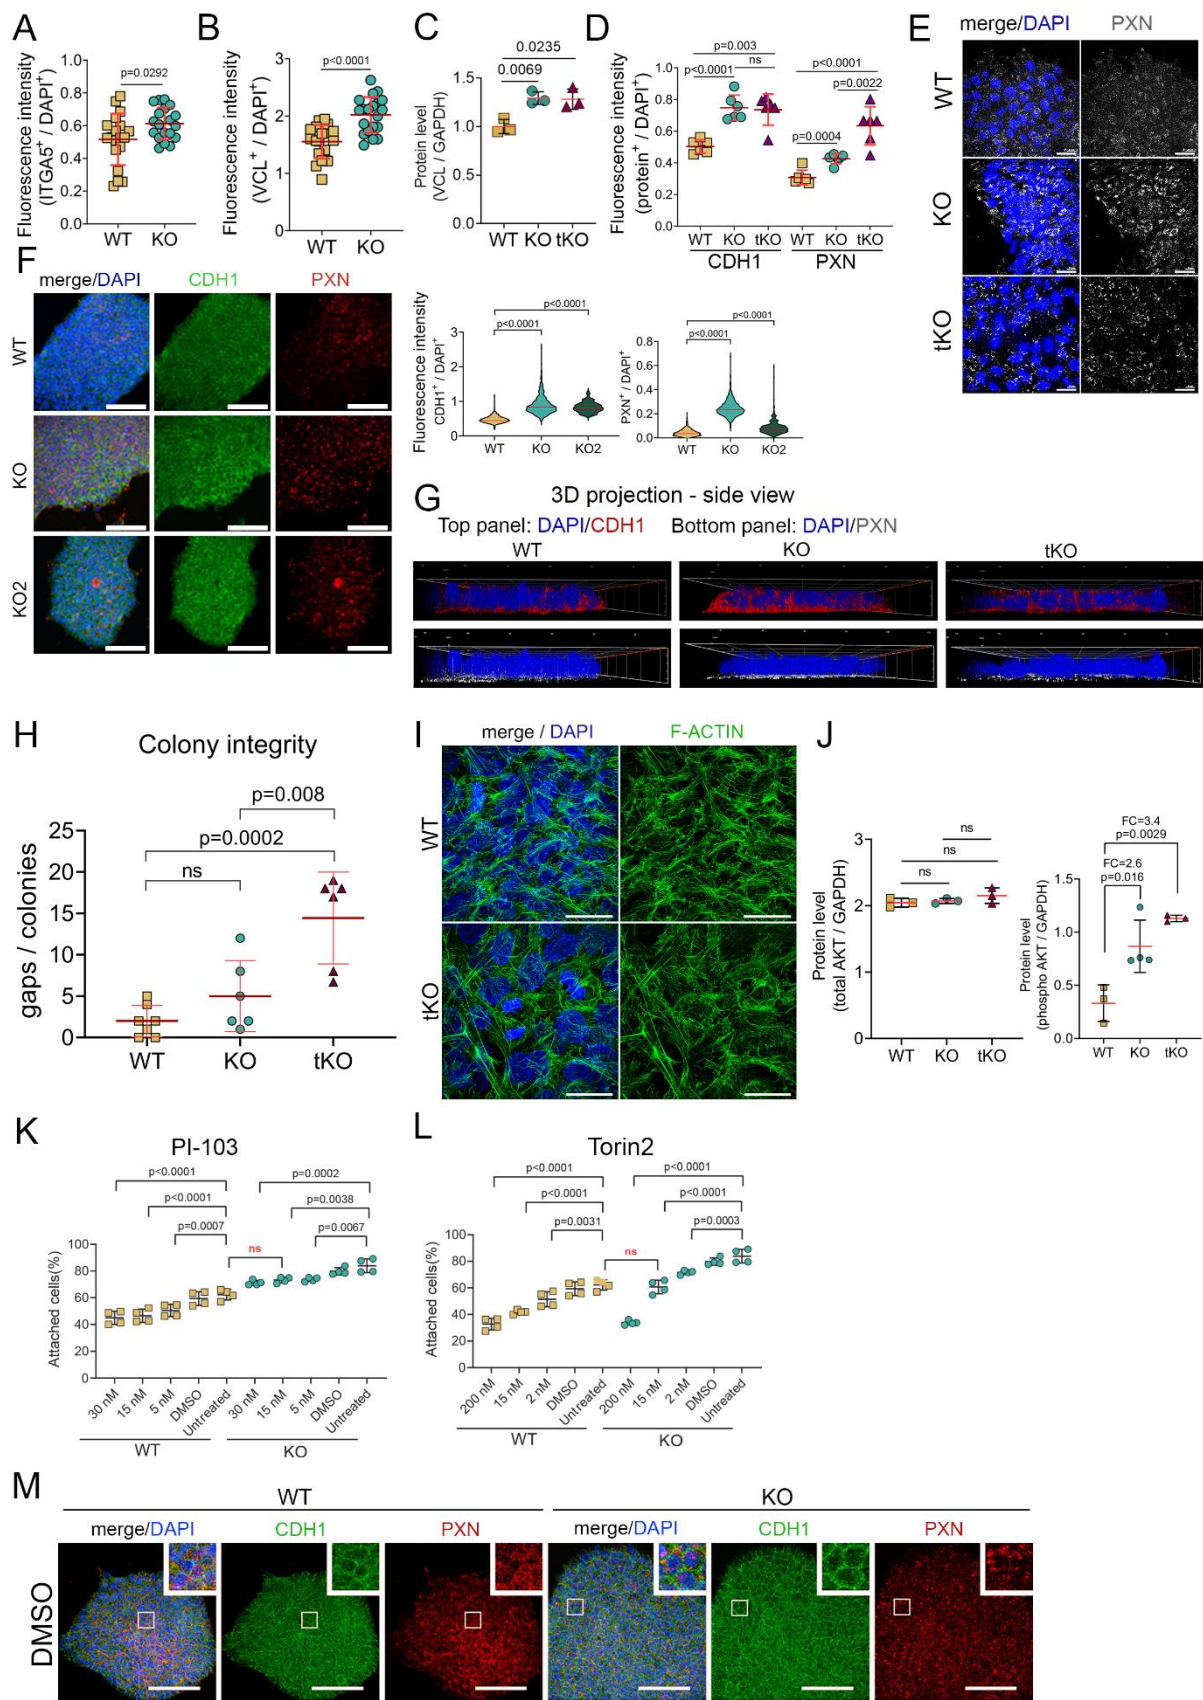

**Supplementary Figure 4. Genes regulated by ETV1 in hPSCs are involved in cell adhesion and PI3K/AKT pathway**

- A.** Quantification of fluorescence intensity (ITGA5+/DAPI) calculated from the immunofluorescence images of ITGA5 staining in WT (yellow) and KO (green) hPSCs.  $N = 3$  biological replicates.
- B.** Quantification of fluorescence intensity (VCL+/DAPI) calculated in WT (yellow) and KO (green) hPSCs.  $N = 3$  biological replicates.
- C.** Quantification of western blotting with antibody against VCL (upper plot) in WT, KO, and tKO hPSCs.  $N = 3$  biological replicates.
- D.** Quantification of fluorescence intensity (CDH1+/DAPI and PXN+/DAPI) in WT (yellow), KO (green), and tKO (maroon) hPSCs.  $N = 3$  biological replicates.
- E.** High-resolution microscopy images of PXN (grey) immunofluorescence staining confirming different distributions of PXN protein in WT, KO, and tKO hPSC colonies. Scale bar = 20 nm.
- F.** Representative immunofluorescence images show increased protein levels of CDH1 (green) and PXN (red) in KO and KO2 compared to WT hPSCs. DAPI marks the nuclei (blue). On the right, quantification of fluorescence intensity (PXN+/DAPI) calculated from the immunofluorescence images of PXN staining in WT (yellow), KO (light green), and KO2 (dark green) hPSCs.  $N = 3$  biological replicates. Scale bar = 100  $\mu$ m.
- G.** High-resolution microscopy 3D projections (side view) of CDH1 (red, upper panel) and PXN (grey, bottom panel) immunofluorescence staining confirm the highest protein levels of CDH1 in KO, followed by tKO, compared to WT hPSCs. Additionally, the images reveal different distributions of CDH1 and PXN proteins in WT, KO, and tKO hPSC colonies.
- H.** Quantification of CDH1 immunofluorescence staining shows gaps in the colonies of WT, KO, and tKO hPSCs.
- I.** High-resolution microscopy images of F-ACTIN (green) immunofluorescence staining show different actin cytoskeleton organization along WT and tKO hPSC at colony edges. Scale bar = 20 nm.
- J.** Quantification of western blotting with antibody against phospho-AKT (left plot) and total AKT (right plot) proteins confirm increased phosphorylation of AKT protein in KO and tKO compared to WT hPSCs, while total AKT protein level remains unchanged in *ETV1* and *ETV1/ETV4/ETV5* deficient hPSCs compared to WT.  $N = 3$  biological replicates.
- K.** Quantification of crystal violet staining shows a dose-dependent decrease in a fraction of attached WT (yellow) and KO (green) hPSCs after PI3K/AKT pathway inhibition by PI-103, compared to untreated and control (DMSO-treated) WT or KO hPSCs, respectively.  $N = 4$  biological replicates.



**L.** Quantification of crystal violet staining shows a dose-dependent decrease in a fraction of attached WT (yellow) and KO (green) hPSCs after PI3K/AKT pathway inhibition by Torin2, compared to untreated and control (DMSO-treated) WT or KO hPSCs, respectively.  $N = 4$  biological replicates.

**M.** Representative images of immunofluorescence staining show protein levels of CDH1 (green) and PXN (red) in WT and KO hPSCs cultured in medium with DMSO; a control experimental condition tested alongside the 72-hour PI3K/AKT pathway activity modulation experiments. DAPI marks the nuclei (blue).  $N = 3$  biological replicates. Scale bar = 200  $\mu\text{m}$ .

The following tests were used to determine the  $p$ -values shown on the graph: a two-sided student's t-test for plots **A-B**, the Welch's t-test for plot **C**, a one-way ANOVA with Turkey's correction for multiple comparisons for plot **D**, a one-way ANOVA for multiple comparisons for plots **F**, **H**, and **J-L**. Data are presented as means  $\pm$  SDs.

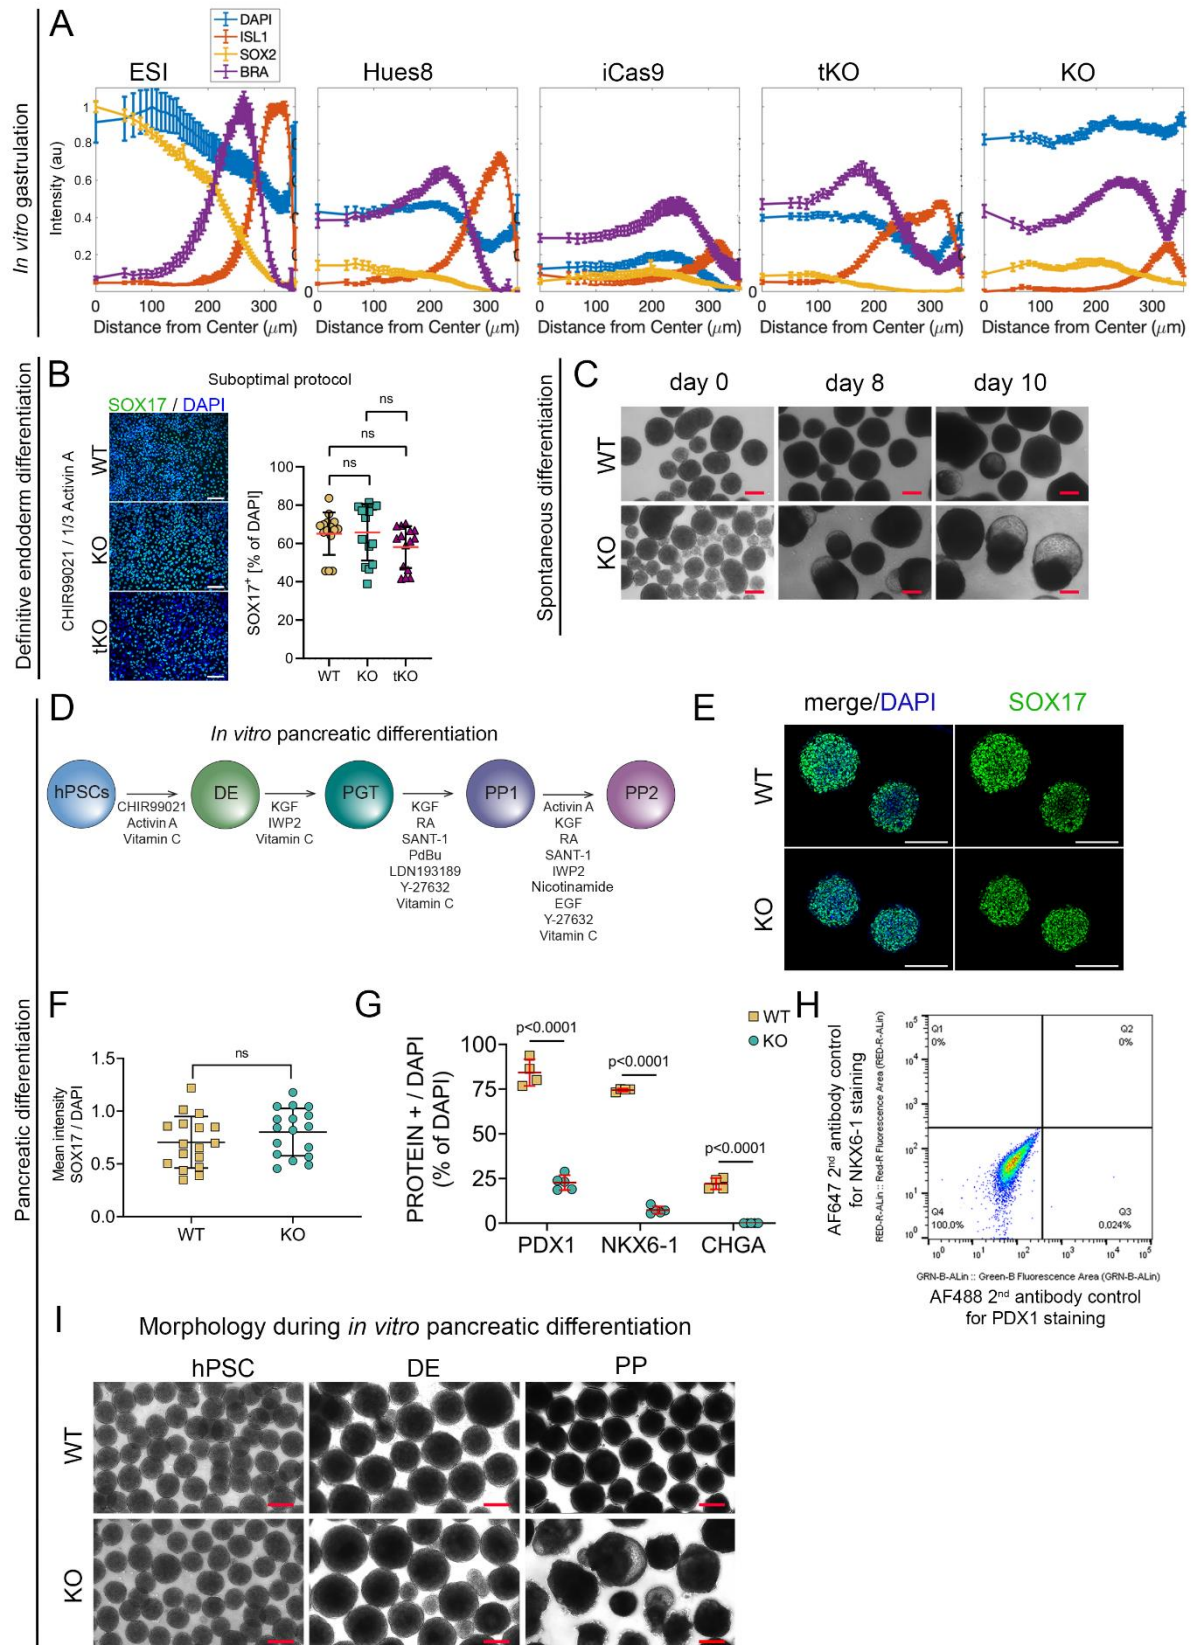

**Supplementary Figure 5. Deletions of ETV genes affect *in vitro* gastruloid formation, direction of spontaneous *in vitro* differentiation and pancreatic *in vitro* differentiation**

- A.** Distribution of positive signals from DAPI (blue), ISL1 (red), SOX2 (yellow) and BRA (purple) immunofluorescence staining from the center to the edge of gastruloids was performed in ESI, Hues8, iCas9, tKO, and KO gastruloids.  $N = 3$  biological replicates.
- B.** WT, KO, and tKO differentiation to definitive endoderm using suboptimal protocol with a decreased dose of Activin A.
- C.** Bright-field images of WT and KO embryoid bodies (EB) during spontaneous *in vitro* differentiation of hPSC, without the addition of lineage-specific growth factors. At day 0, the morphology of WT and KO EBs were similar, while at day 8 and 10, the KO EBs were bigger than WT EBs, and cyst-like structures were observed in KO EBs.
- D.** Detail scheme showing the timeline of 12-day hPSC *in vitro* differentiation into pancreatic progenitors. During differentiation, hPSCs pass through following stages: definitive endoderm (DE), primitive gut tube (PGT), pancreatic progenitors 1 (PP1), pancreatic progenitors 2 (PP2). The small molecules driving differentiation towards indicated stages are listed below the arrows.
- E.** Representative immunofluorescence staining of SOX17 (green) shows similar protein levels of SOX17 between KO and WT at the definitive endoderm stage during *in vitro* differentiation.  $N = 3$  biological replicates. Scale bar = 200  $\mu\text{m}$ .
- F.** Quantification of fluorescence intensity (SOX17+/DAPI) calculated from the immunofluorescence images of SOX17 staining of WT (yellow) and KO (green) DE confirmed no difference in SOX17 protein levels between KO and WT cells.  $N = 3$  biological replicates.
- G.** The graph shows the relative fluorescence intensity of PDX1, NKX6-1, and CHGA, normalized to DAPI staining, in WT (yellow) and KO (green) PPs.  $N = 4$  biological replicates.
- H.** Secondary antibody negative control was used to set the gates for flow cytometry analysis for NKX6-1 (vertical) and PDX1 (horizontal) staining at the pancreatic progenitor stage of *in vitro* differentiation.
- I.** Representative bright-field images of WT and KO cells differentiated to pancreatic progenitors (PPs). The overall morphology of 3D spheres at hPSC and DE does not differ between KO and WT, while at the PP stage, KO spheres are bigger than WT and display cyst-like structures. Scale bar = 200  $\mu\text{m}$ .

For plot **B**, a one-way ANOVA with Turkey's correction for multiple comparisons was used, for plots **F-G**, a two-sided student's t-test was used to determine the  $p$ -values shown on the graph. Data are presented as means  $\pm$  SDs.

A

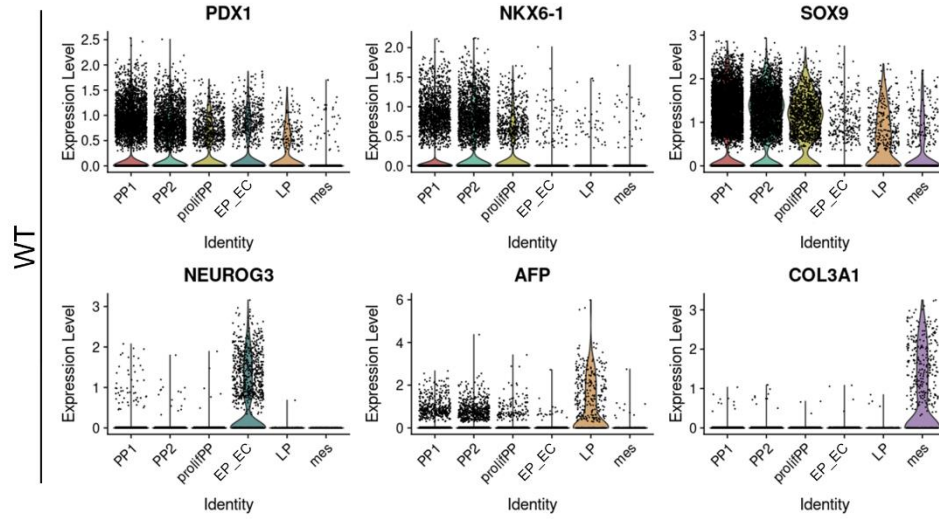

B

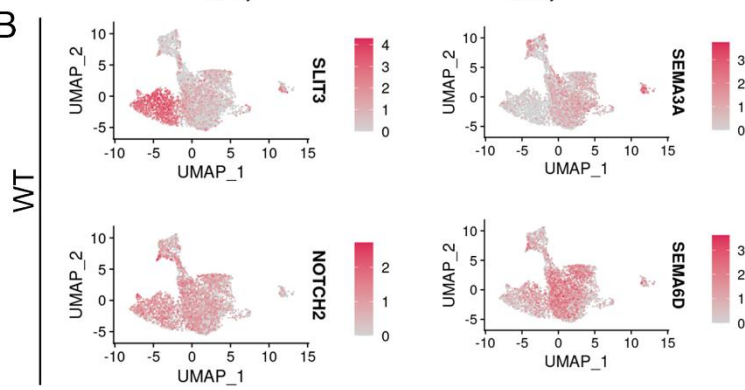

C

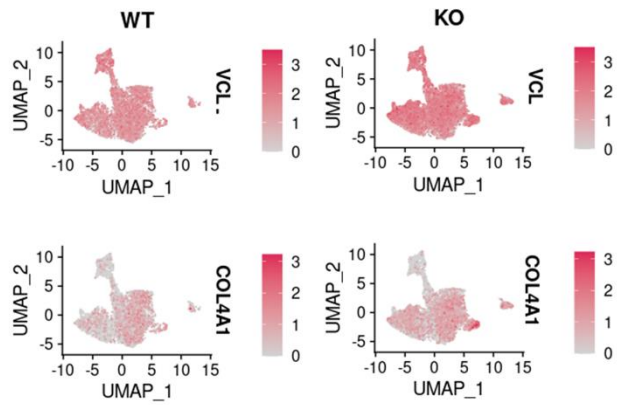

D

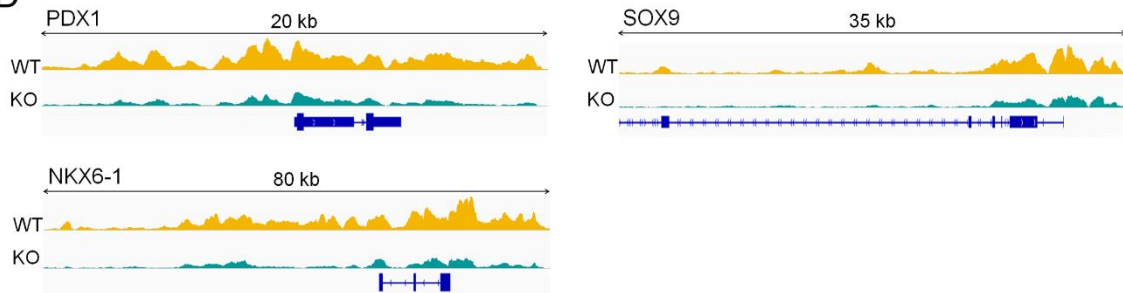



**Supplementary Figure 6. *ETV1* deletion disturbs *in vitro* differentiation towards pancreatic progenitors**

- A.** Violon plots demonstrating the expression of well-known markers for each cluster in WT PPs: *PDX1*, *NKX6-1* and *SOX9* for pancreatic progenitors 1 (PP1), pancreatic progenitors 2 (PP2) and proliferating pancreatic progenitors (prolifPP); *NEUROG3* for endocrine progenitors and endocrine cells (EPandEC); *AFP* for liver progenitors (LP), *COL3A1* for mesenchyme cells (mes).
- B.** Feature plots showing expression (red) of *SLIT3*, *NRXN3*, *SEMA3A*, and *SEMA6D*.
- C.** Feature plots showing expression (red) of *VCL* and *COL4A1* in WT and KO cells.
- D.** ATAC-seq tracks demonstrating *PDX1*, *SOX9*, and *NKX6-1* loci in WT (yellow) and KO (green) PPs. The peaks represent normalized and combined biological replicates.

# Supplementary tables

**Supplementary Table 1. Sequence of sgRNAs used for *ETV* genes targeting**

| Clone name              | sgRNA name     | sgRNA sequence 5'→3' (T7-gRNA-TracR)                                                                                                |
|-------------------------|----------------|-------------------------------------------------------------------------------------------------------------------------------------|
| <b>ETV1 KO, exon4</b>   | ETV1 gRNA1 ex4 | TAATACGACTCACTATAGGGTCCCTTTGTAGAGTCAGCGTTGTT<br>TTAGAGCTAGAAATAGCAAGTTAAAATAAGGCTAGTCCGTTAT<br>CAACTTGAAAAAGTGGCACCAGAGTCGGTGCTTTT  |
|                         | ETV1 gRNA2 ex4 | TAATACGACTCACTATAGGGACGAGAAACCAAATGTCTTGTT<br>TTAGAGCTAGAAATAGCAAGTTAAAATAAGGCTAGTCCGTTAT<br>CAA`CTTGAAAAAGTGGCACCAGAGTCGGTGCTTTT   |
|                         | ETV1 gRNA3 ex4 | TAATACGACTCACTATAGGGGGGCTCATGATTCAGAAGGTGTGTT<br>TTAGAGCTAGAAATAGCAAGTTAAAATAAGGCTAGTCCGTTAT<br>CAACTTGAAAAAGTGGCACCAGAGTCGGTGCTTTT |
| <b>ETV1 KO-2, exon9</b> | ETV1 gRNA1 ex9 | TAATACGACTCACTATAGGGGGGCATCGTCGGCAAAGGTGTT<br>TTAGAGCTAGAAATAGCAAGTTAAAATAAGGCTAGTCCGTTAT<br>CAACTTGAAAAAGTGGCACCAGAGTCGGTGCTTTT    |
|                         | ETV1 gRNA2 ex9 | TAATACGACTCACTATAGGGTGCTTAAAGCCTTGTGGTG<br>TTTTAGAGCTAGAAATAGCAAGTTAAAATAAGGCTAGTCCGTT<br>ATCAACTTGAAAAAGTGGCACCAGAGTCGGTGCTTTT     |
|                         | ETV1 gRNA3 ex9 | TAATACGACTCACTATAGGGGGCCGCACTGCCAACCATG<br>TTTTAGAGCTAGAAATAGCAAGTTAAAATAAGGCTAGTCCGTT<br>ATCAACTTGAAAAAGTGGCACCAGAGTCGGTGCTTTT     |
| <b>tKO</b>              | ETV1 gRNA1 ex4 | TAATACGACTCACTATAGGGTCCCTTTGTAGAGTCAGCGTTGTT<br>TTAGAGCTAGAAATAGCAAGTTAAAATAAGGCTAGTCCGTTAT<br>CAACTTGAAAAAGTGGCACCAGAGTCGGTGCTTTT  |
|                         | ETV1 gRNA2 ex4 | TAATACGACTCACTATAGGGACGAGAAACCAAATGTCTTGTT<br>TTAGAGCTAGAAATAGCAAGTTAAAATAAGGCTAGTCCGTTAT<br>CAACTTGAAAAAGTGGCACCAGAGTCGGTGCTTTT    |
|                         | ETV1 gRNA3 ex4 | TAATACGACTCACTATAGGGGGGCTCATGATTCAGAAGGTGTGTT<br>TTAGAGCTAGAAATAGCAAGTTAAAATAAGGCTAGTCCGTTAT<br>CAACTTGAAAAAGTGGCACCAGAGTCGGTGCTTTT |
|                         | ETV4 gRNA1     | TAATACGACTCACTATAGGGGCTCACGCTGCTGAAGGTGTATGTT<br>TTAGAGCTAGAAATAGCAAGTTAAAATAAGGCTAGTCCGTTAT<br>CAACTTGAAAAAGTGGCACCAGAGTCGGTGCTTTT |
|                         | ETV4 gRNA2     | TAATACGACTCACTATAGGGAATGCCCGCAGTCACCCTGTGTT<br>TTAGAGCTAGAAATAGCAAGTTAAAATAAGGCTAGTCCGTTAT<br>CAACTTGAAAAAGTGGCACCAGAGTCGGTGCTTTT   |
|                         | ETV4 gRNA3     | TAATACGACTCACTATAGGGTCTTTACCTTCAGAGTCGAGTGTT<br>TTAGAGCTAGAAATAGCAAGTTAAAATAAGGCTAGTCCGTTAT<br>CAACTTGAAAAAGTGGCACCAGAGTCGGTGCTTTT  |
|                         | ETV5 gRNA3     | TAATACGACTCACTATAGGGGATCTGGCTCACGATTCTGATGTT<br>TTAGAGCTAGAAATAGCAAGTTAAAATAAGGCTAGTCCGTTAT<br>CAACTTGAAAAAGTGGCACCAGAGTCGGTGCTTTT  |
|                         | ETV5 gRNA4     | TAATACGACTCACTATAGGGATCTACACGCTACTGTCACTTGTT<br>TTAGAGCTAGAAATAGCAAGTTAAAATAAGGCTAGTCCGTTAT<br>CAACTTGAAAAAGTGGCACCAGAGTCGGTGCTTTT  |
|                         | ETV5 gRNA5     | TAATACGACTCACTATAGGGATCTACACGCTACTGTCACTTGTT<br>TTAGAGCTAGAAATAGCAAGTTAAAATAAGGCTAGTCCGTTAT<br>CAACTTGAAAAAGTGGCACCAGAGTCGGTGCTTTT  |

**Supplementary Table 2. Antibodies used for immunofluorescence staining**

| Antigen | Company                   | Catalog    | Dilution | Primary /<br>Secondary   | Host   | Reactivity   |
|---------|---------------------------|------------|----------|--------------------------|--------|--------------|
| ETV1    | Thermo Fisher Scientific  | PA5-67447  | 1:100    | Primary                  | Rabbit | Hu           |
| ETV4    | Santa Cruz                | sc-166629  | 1:200    | Primary                  | Mouse  | Hu, Mus, Rat |
| ETV5    | ProteinTech               | 13011-1-AP | 1:100    | Primary                  | Rabbit | Hu, Mus, Rat |
| OCT3/4  | Santa Cruz                | sc-5279    | 1:50     | Primary                  | Mouse  | Hu, Mus, Rat |
| NANOG   | R&D                       | AF1997     | 1:40     | Primary                  | Goat   | Hu           |
| ITGA5   | Santa Cruz                | sc-9969    | 1:100    | Primary                  | Mouse  | Hu           |
| PXN     | Santa Cruz                | sc-365379  | 1:100    | Primary                  | Mouse  | Hu, Mus, Rat |
| VCL     | Santa Cruz                | sc-73614   | 1:100    | Primary                  | Mouse  | Hu, Mus, Rat |
| CDH1    | R&D                       | AF748      | 1:100    | Primary                  | Goat   | Hu, Mus      |
| F-ACTIN | Invitrogen                | A12379     | 1:200    | Primary-conjugated AF488 | —      | Hu           |
| BRA     | R&D                       | MAB20851   | 1:400    | Primary                  | Rabbit | Hu           |
| ISL1    | DSHB                      | 39.4D-5    | 1:100    | Primary                  | Mouse  | Hu, Mus, Rat |
| SOX2    | Cell Signaling Technology | 23064s     | 1:200    | Primary                  | Rabbit | Hu, Mus      |
| SOX17   | R&D                       | AF1924     | 1:100    | Primary                  | Goat   | Hu           |
| FOXA2   | R&D                       | AF2400     | 1:100    | Primary                  | Goat   | Hu           |
| PDX1    | R&D                       | AF2419     | 1:100    | Primary                  | Goat   | Hu           |
| NKX6-1  | DSHB                      | F55A10     | 1:20     | Primary                  | Mouse  | Hu, Mus      |
| CHGA    | Abcam                     | ab15160    | 1:200    | Primary                  | Rabbit | Hu           |
| COL4A   | Santa Cruz                | sc-59814   | 1:100    | Primary                  | Mouse  | Hu           |

|                |                         |             |       |           |        |                       |
|----------------|-------------------------|-------------|-------|-----------|--------|-----------------------|
| AlexaFluor 488 | Jackson ImmunoResearch  | 715-545-147 | 1:400 | Secondary | Donkey | anti-Goat IgG (H+L)   |
| AlexaFluor 488 | Jackson ImmunoResearch  | 711-545-152 | 1:400 | Secondary | Donkey | anti-Rabbit IgG (H+L) |
| AlexaFluor 488 | Jackson ImmunoResearch  | 705-545-150 | 1:400 | Secondary | Donkey | anti-Mouse IgG (H+L)  |
| TRITC          | Jackson ImmunoResearch  | 705-025-147 | 1:400 | Secondary | Donkey | anti-Goat IgG (H+L)   |
| TRITC          | Jackson ImmunorResearch | 715-025-150 | 1:400 | Secondary | Donkey | anti-Mouse IgG (H+L)  |
| TRITC          | Jackson ImmunoResearch  | 711-025-152 | 1:400 | Secondary | Donkey | anti-Rabbit IgG (H+L) |
| AlexaFluor 647 | Jackson ImmunoResearch  | 705-605-147 | 1:400 | Secondary | Donkey | anti-Goat IgG (H+L)   |
| AlexaFluor 647 | Jackson ImmunoResearch  | 711-605-152 | 1:400 | Secondary | Donkey | anti-Rabbit IgG (H+L) |
| AlexaFluor 647 | Jackson ImmunoResearch  | 715-605-151 | 1:400 | Secondary | Donkey | anti-Mouse IgG (H+L)  |

Hu – human, Mus – mouse

**Supplementary Table 3. Antibodies used for western blotting**

| Antibody name        | Company        | Catalog    | Dilution | Diluted in              | Incubation time |
|----------------------|----------------|------------|----------|-------------------------|-----------------|
| ETV1                 | R&D            | MAB9389    | 1:500    | 5% non-fat dry milk     | O/N             |
| ETV1*                | Invitrogen     | PA5-67447  | 1:1000   | 3% BSA in TBS-T         | O/N             |
| ETV4                 | Santa Cruz     | sc-166629  | 1:1000   | 5% non-fat dry milk     | O/N             |
| ETV5                 | ProteinTech    | 13011-1-AP | 1:1000   | 5% non-fat dry milk     | O/N             |
| pHH3*                | Millipore      | 06-570     | 1:1000   | 3% BSA in TBS-T         | O/N             |
| Phospho-AKT (Ser473) | Cell Signaling | 9271       | 1:1000   | 1% BSA in TBS-T         | O/N             |
| VCL                  | Santa Cruz     | sc-73614   | 1:1000   | 3% BSA in TBS-T         | O/N             |
| Total AKT            | Cell Signaling | 4691       | 1:1000   | 0.125% non-fat dry milk | O/N             |
| GAPDH                | Millipore      | MAB374     | 1:2000   | 0.125% non-fat dry milk | O/N             |



| Antibody name        | Company        | Catalog    | Dilution | Diluted in              | Incubation time |
|----------------------|----------------|------------|----------|-------------------------|-----------------|
| ETV1                 | R&D            | MAB9389    | 1:500    | 5% non-fat dry milk     | O/N             |
| ETV1*                | Invitrogen     | PA5-67447  | 1:1000   | 3% BSA in TBS-T         | O/N             |
| ETV4                 | Santa Cruz     | sc-166629  | 1:1000   | 5% non-fat dry milk     | O/N             |
| ETV5                 | ProteinTech    | 13011-1-AP | 1:1000   | 5% non-fat dry milk     | O/N             |
| pHH3*                | Millipore      | 06-570     | 1:1000   | 3% BSA in TBS-T         | O/N             |
| Phospho-AKT (Ser473) | Cell Signaling | 9271       | 1:1000   | 1% BSA in TBS-T         | O/N             |
| VCL                  | Santa Cruz     | sc-73614   | 1:1000   | 3% BSA in TBS-T         | O/N             |
| Total AKT            | Cell Signaling | 4691       | 1:1000   | 0.125% non-fat dry milk | O/N             |
| GAPDH*               | Millipore      | MAB374     | 1:5000   | 3% BSA in TBS-T         | O/N             |
| anti-rabbit          | Sigma Aldrich  | A9169      | 1:20000  | 0.125% non-fat dry milk | 1 h             |
| anti-mouse           | Sigma Aldrich  | A9044      | 1:20000  | 0.125% non-fat dry milk | 1 h             |

O/N=overnight

\*subcellular fractioning

**Supplementary Table 4. Antibodies used for flow cytometry analysis**

| Antigen | Company       | Catalog | Dilution | Primary/<br>Secondary | Host   | Reactivity   |
|---------|---------------|---------|----------|-----------------------|--------|--------------|
| CDH1    | R&D           | AF748   | 1:100    | Primary               | Goat   | Hu, Mus      |
| pHH3    | Millipore     | 06-570  | 1:300    | Primary               | Rabbit | Hu, Mus      |
| Ki67    | BD Pharmingen | 556027  | 1:300    | Primary               | Mouse  | Hu, Mus, Rat |
| KLF4    | R&D           | AF3640  | 1:300    | Primary               | Goat   | Hu           |
| SOX2    | R&D           | MAB2018 | 1:300    | Primary               | Mouse  | Hu, Mu, Rat  |

|                |                          |             |       |           |        |                       |
|----------------|--------------------------|-------------|-------|-----------|--------|-----------------------|
| OCT3/4         | Santa Cruz               | sc-5279     | 1:300 | Primary   | Mouse  | Hu, Mus, Rat          |
| NANOG          | R&D                      | AF1997      | 1:200 | Primary   | Goat   | Hu                    |
| ETV1           | Thermo Fisher Scientific | PA5-67447   | 1:300 | Primary   | Rabbit | Hu                    |
| ETV4           | Santa Cruz               | sc-166629   | 1:600 | Primary   | Mouse  | Hu, Mus, Rat          |
| ETV5           | ProteinTech              | 13011-1-AP  | 1:300 | Primary   | Rabbit | Hu, Mus, Rat          |
| ITGA5          | Santa Cruz               | sc-9969     | 1:100 | Primary   | Mouse  | Hu                    |
| PDX1           | R&D                      | AF2419      | 1:100 | Primary   | Goat   | Hu                    |
| NKX6-1         | DSHB                     | F55A10      | 1:20  | Primary   | Mouse  | Hu, Mus               |
| AlexaFluor 488 | Jackson ImmunoResearch   | 715-545-147 | 1:400 | Secondary | Donkey | anti-Goat IgG (H+L)   |
| AlexaFluor 488 | Jackson ImmunoResearch   | 711-545-152 | 1:400 | Secondary | Donkey | anti-Rabbit IgG (H+L) |
| AlexaFluor 488 | Jackson ImmunoResearch   | 705-545-150 | 1:400 | Secondary | Donkey | anti-Mouse IgG (H+L)  |
| TRITC          | Jackson ImmunoResearch   | 705-025-147 | 1:400 | Secondary | Donkey | anti-Goat IgG (H+L)   |
| TRITC          | Jackson ImmunoResearch   | 715-025-150 | 1:400 | Secondary | Donkey | anti-Mouse IgG (H+L)  |
| TRITC          | Jackson ImmunoResearch   | 711-025-152 | 1:400 | Secondary | Donkey | anti-Rabbit IgG (H+L) |
| AlexaFluor 647 | Jackson ImmunoResearch   | 705-605-147 | 1:400 | Secondary | Donkey | anti-Goat IgG (H+L)   |
| AlexaFluor 647 | Jackson ImmunoResearch   | 711-605-152 | 1:400 | Secondary | Donkey | anti-Rabbit IgG (H+L) |
| AlexaFluor 647 | Jackson ImmunoResearch   | 715-605-151 | 1:400 | Secondary | Donkey | anti-Mouse IgG (H+L)  |

Hu – human, Mus – mouse

**Supplementary Table 5. Sequences of qPCR primers**

| Primer name   | Primer sequence (5'-3')    |
|---------------|----------------------------|
| ACTB_F        | ACAGAGCCTCGCCTTTGCCGAT     |
| ACTB_R        | ATCATCCATGGTGAGCTGGCGG     |
| ChIP_CDKN1A_F | TGGAGATCAGGTTGCCCTTT       |
| ChIP_CDKN1A_R | TCTGGCCTCAAGATGCTTTGT      |
| ChIP_COL4A6_F | GAGGGAGTGACGCTCAGTTA       |
| ChIP_COL4A6_R | TCTCATTGGTGTGCGTACCA       |
| ChIP_ITGA5_F  | TGAATGACCCCAAACCTCCTGG     |
| ChIP_ITGA5_R  | CGAACGCTGTCTCTGTACCT       |
| ChIP_JUN_F    | ACCTTAAGGGCGGTATTCCC       |
| ChIP_JUN_R    | GGAAACAACAACCACCCCTC       |
| ChIP_PDGFRB_F | TGTGCCAATTCACCCCTGG        |
| ChIP_PDGFRB_R | AAATGCACTCTCAGCCTCCTG      |
| ChIP_VCL_F    | GCTCCCACCATGCCCTTAT        |
| ChIP_VCL_R    | GCATCTCGAAAAGGGACCAGT      |
| ETV4_F        | GATGGAGCGGAGGATGAAAG       |
| ETV4_R        | GGGCTGTGGAAAGCTAGGTT       |
| ETV5_F        | ATGGACGGGTTTTATGATCAGCAAGT |
| ETV5_R        | TTAGCACCAAGAGCCTGCTC       |
| GAPDH_F       | AAGGTGAAGGTCGGAGTCAA       |
| GAPDH_R       | AATGAAGGGGTCATTGATGG       |
| GATA4_F       | CGACACCCCAATCTCGATATGT     |
| GATA4_R       | ACAGATAGTGACCCGTCCCA       |
| HHEX_F        | GAAATATCTCTCTCCGCCCCGA     |
| HHEX_R        | GGGTTCTCCTGTTTTAGTCTCC     |
| HOXA1_F       | GGTGTCTTACTCCCACTCAAG      |
| HOXA1_R       | TCTCCAACCTTCCCTGTTTTGG     |
| MESP1_F       | CACCGTCCCCGCTCCTT          |
| MESP1_R       | AGAGACGGCGTCAGTTGTCC       |
| MIXL1_F       | GGATCCAGCTTTTATTTTCTCCCC   |
| MIXL1_R       | TCCAGGAGCACAGTGGTTGA       |
| OTX2_F        | CGAGGGTGCAGGTATGGTTTA      |
| OTX2_R        | GCCACTTGTTCCACTCTCTGA      |
| PAX6_F        | CGATAACATACCAAGCGTGTCA     |
| PAX6_R        | TGCCCCGTTCAACATCCTTAGT     |
| PDGFRA_F      | CTATGTGCCAGACCCAGATGT      |
| PDGFRA_R      | CAGGAGTCTCGGGATCAGTTG      |
| SOX1_F        | GCAGGTCCAAGCACTTACAAG      |
| SOX1_R        | GGGTGGTGGTGGTAATCTCTT      |
| SOX17_F       | CGCTTTCATGGTGTGGGCTA       |
| SOX17_R       | CTTCCACGACTTGCCCAGC        |

|         |                        |
|---------|------------------------|
| SOX2_F  | CATGCACCGCTACGACGT     |
| SOX2_R  | CTGCGAGTAGGACATGCTGTA  |
| SOX7_F  | TTTGGGCCAAGGACGAGAGG   |
| SOX7_R  | CTTCCACGACTTTCCCAGCAT  |
| MNX1_F  | CAAGCTCAACAAGTACCTGTCG |
| MNX1_R  | GCTGCGTTTCCATTTTCATCCG |
| CASZ1_F | TGGAAAGTCACCCAAAGCCG   |
| CASZ1_R | CCCAAACCTCTCGTAGCAGGT  |
| MEIS2_F | TCCAGCATCTCACACATCCG   |
| MEIS2_R | ACTGGTCAATCATGGGCTGT   |
| MYH6_F  | CTACGCAACTGCCGATACTG   |
| MYH6_R  | TGAGATTTTCCCGGTGGAGAG  |
| TNNT2_F | GAATGAGCGGGAGAAGGAGC   |
| TNNT2_R | TGCTTCTGGATGTAACCCCC   |

### Supplementary References

1. Yiangou, L. et al. Method to Synchronize Cell Cycle of Human Pluripotent Stem Cells without Affecting Their Fundamental Characteristics. *Stem Cell Rep* **12**, 165-179 (2019).



## Gating Strategy for Flow Cytometry

### Example 1

#### 1. Live cells

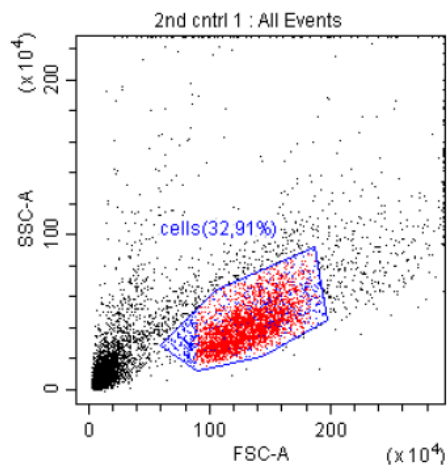

#### 2. Singlets

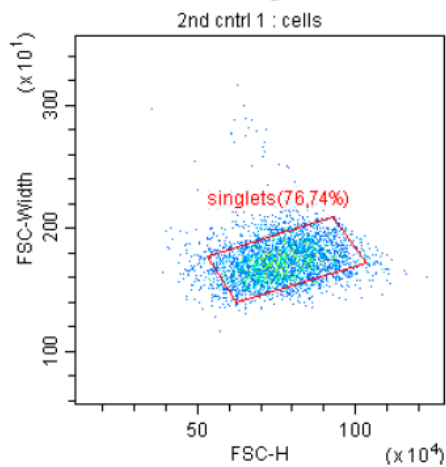

#### 3. Gating for fluorescence signal – on 2<sup>nd</sup> control, singlets

##### 2<sup>nd</sup> antibody control for AF647 on singlets

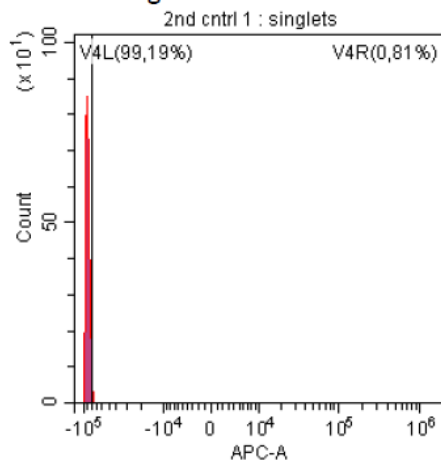

##### 2<sup>nd</sup> antibody control for AF488 on singlets

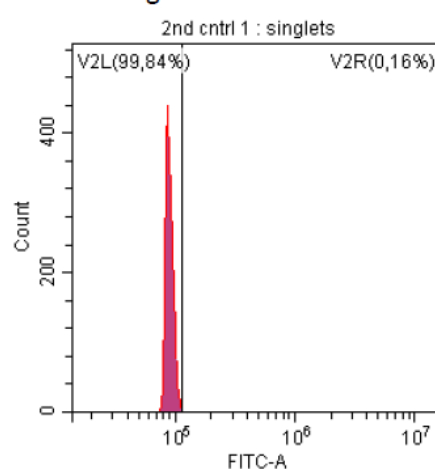

### Example 2

#### 1. Live cells

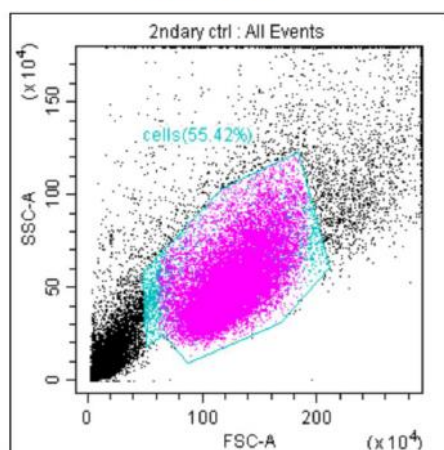

#### 2. Singlets

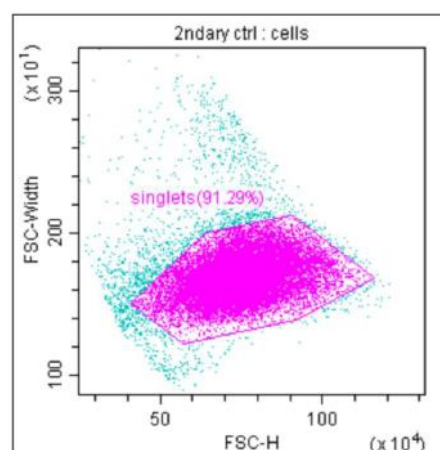

### 3. Gating for fluorescence signal – on 2<sup>nd</sup> control, singlets

2<sup>nd</sup> antibody control for AF647  
on singlets

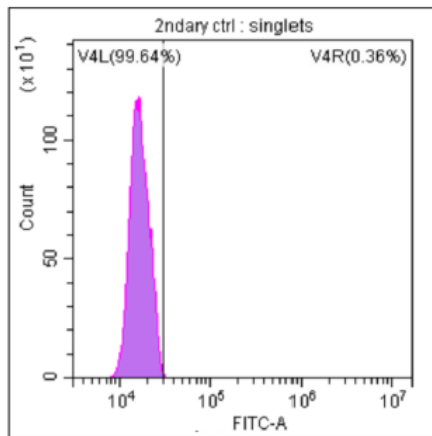

2<sup>nd</sup> antibody control for AF488  
on singlets

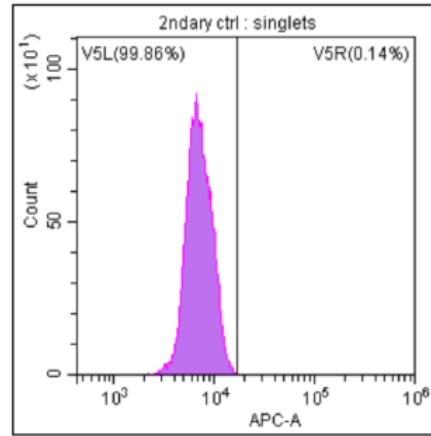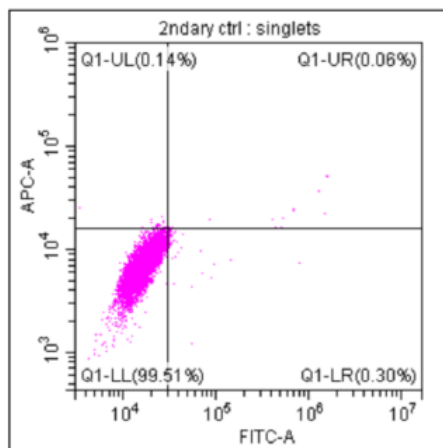

Supplement: MOESM1 [file 41467_2025_56591_MOESM1_ESM.pdf]
